# Supplementary material for: Comparative Proteomic Analysis of tPVAT during Ang II Infusion
Source: MDPI journal article supplement (doi:10.3390/biomedicines9121820), 2021-12-02
Supplement: s1 [file s1]

## **Supplementary figure legends**

### **Figure. S1 Statistical histogram of protein identification and quantitative results.**

Total spectrum: the total number of secondary spectra; Matched spectrum (PSM, Peptide Spectrum Match): the total number of database matching spectra; Peptides: the total number of peptides; Unique peptides: the total number of unique peptides; Identified proteins: total number of identified proteins; Quantified proteins: identified proteins that can be quantified.

**Figure. S2 Quality control of peptides.** (A) The mass deviations of all identified peptides are mainly distributed within 10 ppm, indicating that the identification results are accurate and reliable. (B) About 65.64% of the peptides have a MASCOT score of more than 20. The median MASCOT score is 27.49. (C) The abundance ratio of most proteins is close to 1.

**Figure. S3 Diagram of the fatty acid biosynthesis.** Red boxes represent the up-regulated DEPs, and green boxes represent the down-regulated DEPs.

**Figure. S4 Diagram of PPAR signaling pathway.** Red boxes represent the up-regulated DEPs, and green boxes represent the down-regulated DEPs.

**Figure. S5 Diagram of Ras signaling pathway.** Red boxes represent the up-regulated DEPs, and green boxes represent the down-regulated DEPs.

**Figure. S6 Diagram of HIF-1 signaling pathway.** Red boxes represent the up-regulated DEPs, and green boxes represent the down-regulated DEPs. The yellow boxes represent that there are multiple proteins, and the up or down-regulated expression is inconsistent.

**Figure. S7 Diagram of apoptosis pathway.** Red boxes represent the up-regulated DEPs, and green boxes represent the down-regulated DEPs. The yellow boxes represent that there are multiple proteins, and the up or down-regulated expression is inconsistent.

**Table S1 Parameters and instructions of MASCOT engine search**

| Item                    | Value                                                                                                                       |
|-------------------------|-----------------------------------------------------------------------------------------------------------------------------|
| Enzyme                  | Trypsin                                                                                                                     |
| Max Missed Cleavages    | 2                                                                                                                           |
| Fixed modifications     | Carbamidomethyl (C),<br>iTRAQ 4/8plex (N-term), iTRAQ 4/8plex (K)<br>TMT 6/10/16 plex (N-term), TMT 6/10/16 plex (K)        |
| Variable modifications  | Oxidation (M), iTRAQ 4/8plex (Y), TMT 6/10/16 plex (Y)                                                                      |
| Peptide Mass Tolerance  | $\pm 20$ ppm                                                                                                                |
| Fragment Mass Tolerance | 0.1Da                                                                                                                       |
| Database                | See the project report                                                                                                      |
| Database pattern        | Decoy                                                                                                                       |
| Peptide FDR             | $\leq 0.01$                                                                                                                 |
| Protein Quantification  | The protein ratios are calculated as the median of only<br>unique peptides of the protein                                   |
| Experimental Bias       | Normalizes all peptide ratios by the median protein ratio.<br>The median protein ratio should be 1 after the normalization. |
